# Supplementary material
Source: Springer Nature journal article supplement (https://www.springermedizin.de/resource/supplementary/12885_2010_2122_MOESM4_ESM.pdf/9460574)

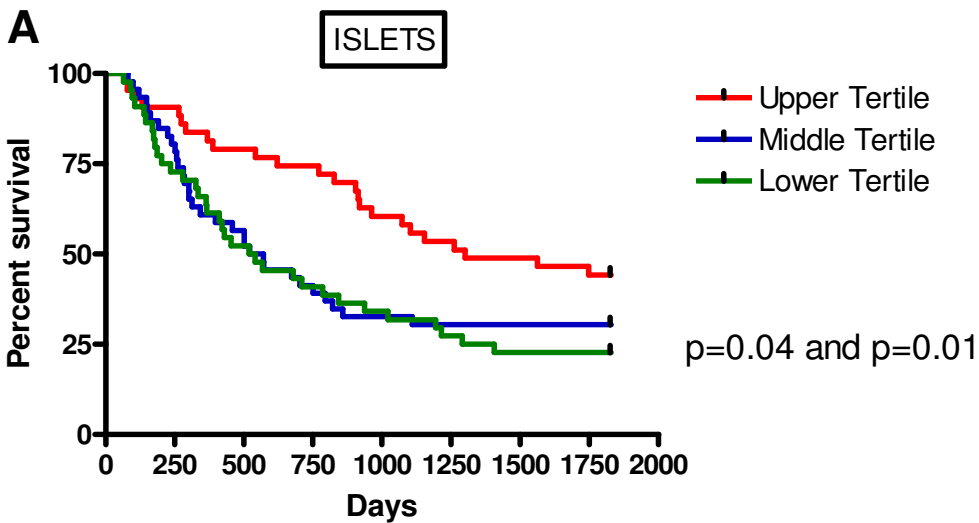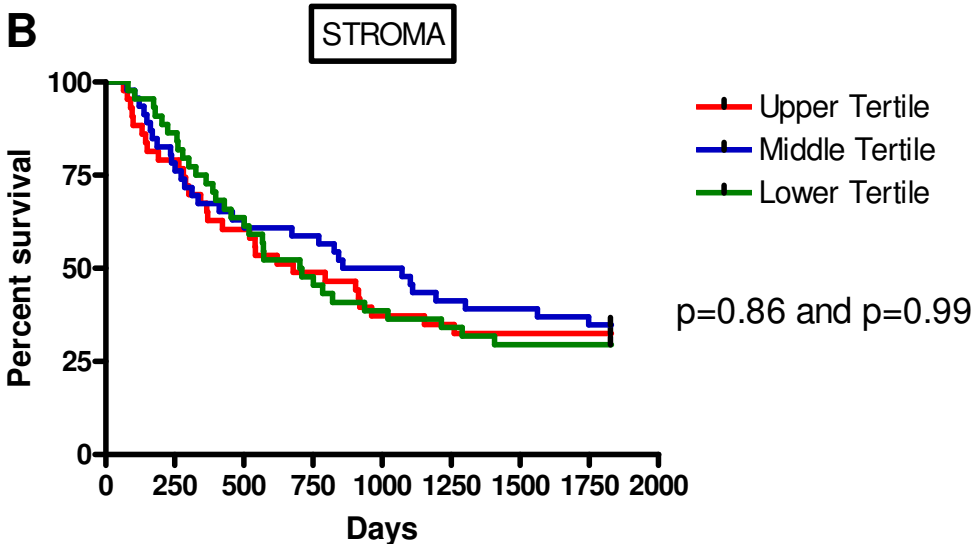

Supplement: MOESM4 [file 9460574]
